# Supplementary material for: Impact of the COVID-19 pandemic on patients with paediatric cancer in low-income, middle-income and high-income countries: a multicentre, international, observational cohort study
Source: HighWire-hosted journal article supplement (doi:10.1136/bmjopen-2021-054690), 2022-04-01
Supplement: bmjopen-2021-054690supp002_data_supplement.pdf [file bmjopen-2021-054690supp002_data_supplement.pdf]

**Appendix S2: Participating Centres****LMIC**

Centre Anti-Cancer, Algeria  
Centre hospitalier universitaire de Batna, Algeria  
CHU Saâdna Abdenour de Sétif, Algeria  
Chittagong Medical College Hospital, Bangladesh  
Dhaka Medical College Hospital, Bangladesh  
Dhaka Shishu (Children) Hospital, Bangladesh  
Brazilian National Cancer Institute (INCA), Brazil  
GPACI - Grupo de Pesquisa e Assistência ao Câncer Infantil, Brazil  
Pediatric Oncology Institute – GRAACC, Brazil  
Ain Shams University Hospital, Egypt  
Al-Hussein University Hospital, Egypt  
Borg El-Arab University Hospital, Egypt  
El Safa Hospital, Egypt  
El Sheikh Zayed Specialized Hospital, Egypt  
Helwan University Hospital, Egypt  
Kasr Al Ainy Hospital, Egypt  
Menoufia University Hospital, Egypt  
MISR Cancer Centre, Egypt  
Tanta University Hospital, Egypt  
Wingat Royal Hospital, Egypt  
Zagazig University Hospital, Egypt  
Tamale Teaching Hospital, Ghana  
Shahid Baghaei Hospital, Iran  
Ibn Al-Atheer Hospital, Iraq  
Raparin Pediatric Teaching Hospital, Iraq  
Al Bashir Hospital, Jordan  
King Abdullah University Hospital, Jordan  
King Hussein Cancer Center, Jordan  
AIC Kijabe Hospital, Kenya  
Benghazi Pediatric Hospital, Libya  
Sabha Medical Centre, Libya  
Tobruk Medical Centre, Libya  
Tripoli University Hospital, Libya  
Universiti Kebangsaan Malaysia Medical Centre, Malaysia  
University of Malaya Medical Centre, Malaysia  
Centre Hospitalo-Universitaire Ibn Sina de Rabat (CHIS), Morocco  
Hôpital des Spécialités ONO, Morocco  
Abubakar Tafawa Balewa University Teaching Hospital, Nigeria  
Ahmadu Bello University Teaching Hospital, Nigeria  
Federal Medical Center, Abeokuta, Nigeria  
Federal Medical Center, Lokoja, Nigeria  
Federal Teaching Hospital Ido-Ekiti, Nigeria  
Lagos University Teaching Hospital, Nigeria  
National Hospital, Nigeria  
Nnamdi Azikiwe University Teaching Hospital, Nigeria  
Olabisi Onabanjo University Teaching Hospital, Nigeria  
University College Hospital (UCH), Nigeria  
University of Abuja Teaching Hospital, Nigeria  
University of Ilorin Teaching Hospital, Nigeria  
Usman Danfodiyo University Teaching Hospital, Nigeria  
Aga Khan University Hospital, Pakistan  
Lahore General Hospital, Pakistan  
Liaquat National Hospital and Medical College, Pakistan  
The Indus Hospital, Pakistan  
Instituto Nacional de Enfermedades Neoplásicas, Peru  
Clinic for Neurosurgery, Clinical Center of Serbia, Serbia

Ola Daring Children's Hospital, Sierra Leone  
Frere Hospital, South Africa  
National Cancer Institute, Sudan  
Tishreen University Hospital, Syria  
Dr. Lutfi Kirdar Kartal Training and Research Hospital, Turkey  
Kanuni Sultan Süleyman Research and Training Hospital, Turkey  
Ministry of Health Marmara University Pendik Research and Application Hospital, Turkey  
Ondokuz Mayıs Üniversitesi, Turkey  
University Teaching Hospital, Zambia

### **HIC**

Salmaniya Medical Complex, Bahrain  
Pantai Jerudong Specialist Centre, Brunei  
The Hospital for Sick Children, Canada  
University Medical Center Hamburg-Eppendorf, Germany  
AHEPA University General Hospital, Greece  
Medical University of Pecs, Department of Paediatrics, Hungary  
Policlinico Umberto I, Sapienza University of Rome, Italy  
Mater Dei Hospital, Sir Anthony Mamo Oncology Centre, Malta  
Khoula Hospital, Oman  
Centro Hospitalar Universitário de São João, Portugal  
King Fahd Central Hospital, Saudi Arabia  
King Salman Armed Forces Hospital, Saudi Arabia  
Prince Mohammed bin Nasser Hospital, Jazan, Saudi Arabia  
KK Women's and Children's Hospital, Singapore  
Vall d'Hebron University Hospital, Spain  
University Children's Hospital of Basel, Switzerland  
Dubai Hospital, United Arab Emirates  
Alder Hay Children's Hospital, United Kingdom  
Birmingham Children's Hospital, United Kingdom  
Gloucestershire Hospitals NHS Foundation Trust, United Kingdom  
John Radcliffe Hospital, United Kingdom  
Children's Hospital of Wisconsin, United States of America  
Johns Hopkins Hospital Bloomberg Children's Hospital, United States of America  
Mayo Clinic, United States of America  
University of Texas Medical Branch, United States of America  
Yale New Haven Hospital, United States of America
